**Telomere transcription in *MLL*-rearranged acute leukemia: increased levels of TERRA  
associate with lymphoid lineage and are independent of telomere length and ploidy**

*Corrado Caslini,<sup>1,2,\*</sup> Amparo Serna<sup>3,4</sup>*

<sup>1</sup> Department of Pathology, University of Michigan Medical School, Ann Arbor, MI 48109, USA; <sup>2</sup> Department of Molecular Biology and Biochemistry, Rutgers University, Nelson Laboratories, Piscataway, NJ 08854, USA; <sup>3</sup> Department of Internal Medicine, University of Michigan Medical School, Ann Arbor, MI 48109, USA; <sup>4</sup> Department of Cancer Epidemiology, H Lee Moffitt Cancer Center & Research Institutes, Tampa, FL 33612, USA

\* Correspondence: [ccaslini@gmail.com](mailto:ccaslini@gmail.com) (CC)

Running title: Increased transcription of TERRA in *MLL*-rearranged ALL

## Abstract

Telomere transcription into telomeric repeat-containing RNA (TERRA) is an integral component of all aspects of chromosome end protection consisting of telomerase- or recombination-dependent telomere elongation, telomere capping, and preservation of (sub)telomeric heterochromatin structure. The chromatin modifier and transcriptional regulator MLL associates with telomeres and regulates TERRA transcription in telomere length homeostasis and response to telomere dysfunction. MLL fusion proteins (MLL-FPs), the product of *MLL* rearrangements in leukemia, also associate with telomeric chromatin. However, an effect on telomere transcription in *MLL*-rearranged (*MLL*-r) leukemia has not yet been evaluated. Here, we show increased UUAGGG repeat-containing RNA levels in *MLL*-r acute lymphoblastic leukemia (ALL). *MLL* rearrangements do not affect telomere length and increased levels of UUAGGG repeat-containing RNA correlate with mean telomere length and reflect increased levels of TERRA. Also, increased levels of TERRA in *MLL*-r ALL occur in the presence of telomerase activity and are independent of ploidy, an underestimated source of variation on the overall transcriptome size in a cell. This *MLL* rearrangement-dependent and lymphoid lineage-associated increase in levels of TERRA supports a sustained telomere transcription by MLL-FPs that correlates with marked genomic stability previously reported in pediatric *MLL*-r ALL.

# Introduction

TERRA consists of RNA polymerase II (RNA pol II)-transcribed RNAs heterogeneous in length which contain telomeric UUAGGG repeats at their 3' end and arise from transcription start sites in subtelomeric regions.<sup>1,2</sup> This evolutionary conserved long non-coding RNA binds to telomeres where, in addition to a telomere-length dependent regulation of telomerase activity,<sup>2-5</sup> it has been seen in rare budding yeast cells surviving telomerase deletion to counteract the DNA-damage response to telomere shortening through the formation of TERRA RNA-telomeric DNA hybrids (R-loops) involved in homologous recombination (HR) responsible for maintaining telomere length, chromosomal stability, and delay in the onset of cellular senescence.<sup>6,7</sup>

Published results indicate different genomic origins of TERRA in mammalian cells,<sup>8-11</sup> from only a few to several of the subtelomeric regions and from CpG-island and non-CpG-island-containing promoters.<sup>12,13</sup> Regardless of their transcriptional origin, early and current data seem to agree on an association of TERRA to nearly all chromosome ends,<sup>1,2,8,10</sup> and now to additional non-telomeric chromosomal regions.<sup>14</sup> Consequently, the number of complete chromosomal sets in a cell, i.e. ploidy, which is an underestimated and non-linearly correlated source of variation in overall transcriptome size,<sup>15,16</sup> also emerges as a potential source of variation in total levels of TERRA, both in terms of numbers of subtelomeric transcription start sites and of telomeres to which TERRA binds.

TERRA has also been shown to bind to heterogeneous nuclear ribonucleoprotein A1

(hnRNPA1) and regulate its ability to displace replication protein A (RPA) from single-stranded telomeric DNA, in favor of the binding of protection of telomeres 1 (POT1) shelterin protein to telomeric 3' overhangs and recruitment of telomerase activity.<sup>4,17,18</sup> In telomerase-independent alternative lengthening of telomeres (ALT) cancer cells carrying a mutation in the alpha-thalassemia/mental retardation syndrome X-linked (*ATR*X) gene, the RPA displacement by hnRNPA1 seems to be affected by compromised cell-cycle regulation of TERRA.<sup>19</sup> Sustained levels of TERRA and sequestered hnRNPA1 around telomeres during late-S to G2/M-phase progression cause persistent association of RPA with single-stranded DNA in highly recombinogenic nucleoprotein structures at telomeres.<sup>19,20</sup> R-loop formation from persistent association of TERRA during telomeric DNA replication is also believed to engage in HR-dependent telomere lengthening in ALT cancer cells, as demonstrated by R-loop resolution, HR reduction, and accelerated telomere shortening following overexpression of the RNA-DNA hybrid-specific endonuclease RNaseH1.<sup>21</sup>

High levels of TERRA also increase histone 3 lysine 9 di/trimethylation (H3K9me2/3) density and heterochromatin protein 1 $\alpha$  (HP1 $\alpha$ ) deposition to telomeric chromatin through the recruitment of Polycomb Repressive Complex 2 (PRC2) and its histone 3 lysine 27 trimethylation (H3K27me3) activity. The resulting crosstalk between H3K27 and H3K9 methylation marks, together with an increased subtelomeric DNA methylation, contribute to telomere heterochromatin formation thus silencing telomere transcription through a TERRA-dependent negative feedback loop.<sup>22-24</sup> This leads to a decrease in TERRA levels as was found in human fibroblasts and cancer cell lines ectopically expressing telomerase in which artificially

elongated telomeres showed increased H3K9me3 density and HP1 $\alpha$  deposition.<sup>23</sup>

Negative feedback regulation of TERRA seems to be impaired in ALT cancer cells with heterogeneous subtelomeric DNA methylation, compromised telomere heterochromatin formation, and increased levels of TERRA.<sup>25-27</sup> Similarly, subtelomeric DNA hypomethylation and reduced telomeric H3K9me3 density in fibroblasts derived from immunodeficiency, centromeric region instability, and facial anomalies (ICF) syndrome type I patients carrying a mutation in the DNA methyltransferase 3b (DNMT3b) also result in impaired telomere heterochromatin formation, with abnormal increase in telomeric histone 3 lysine 4 dimethylation (H3K4me2), TERRA transcription, and non-recombinogenic R-loop accumulation causing accelerated telomere shortening, telomere instability, and premature senescence.<sup>28-30</sup>

TERRA protection from persistent activation of DNA-damage response was initially suggested by the appearance of telomeric dysfunction in ALT cancer cells and human diploid fibroblasts deprived of TERRA or its transcriptional regulator mixed-lineage leukemia (MLL).<sup>22,31,32</sup> The MLL protein, also known as lysine methyltransferase 2A (KMT2A), is the founding member of the Trithorax group (TrxG) of transcriptional activators involved in epigenetic maintenance of gene expression that counteract the gene repression programs established by the Polycomb group (PcG) of transcriptional repressors.<sup>33</sup> MLL is proteolytically cleaved into MLL<sup>N</sup> and MLL<sup>C</sup> fragments held together non-covalently in a KMT2 protein complex bound to hundreds of RNA pol II-poised, developmentally regulated coding and non-coding genes.<sup>34,35</sup> MLL<sup>C</sup> association with KMT2 protein complex subunits WDR5, RbBP5,

ASH2L, and DPY30 is essential for H3K4 methyltransferase activity,<sup>34</sup> while MLL<sup>N</sup> association with LEDGF/PSIP1 and menin subunits confers KMT2 protein complex targeting to the chromatin.<sup>36,37</sup>

The MLL protein binds to telomeric chromatin where it contributes to the maintenance of H3K4me2/3 levels and, in cooperation with the tumor suppressor protein TP53 (p53), to the transcriptional regulation of chromosome-specific TERRA in telomere length homeostasis and at dysfunctional telomeres as part of a protective mechanism from DNA-damage response.<sup>31,32,38</sup> Quantitative mass spectrometry analysis has now identified MLL and its interacting proteins LEDGF/PSIP1, menin, WDR5, and RbBP5 in a TERRA interactome, while LEDGF/PSIP1 and WDR5 are among the hundreds of new proteins found associated with mammalian telomeric chromatin.<sup>11,39,40</sup>

Chromosomal rearrangements of *MLL* gene are frequently identified in pediatric, adult, and therapy-related leukemia in approximately 10% of all human leukemia, with *MLL* rearrangements causing over 70% of infant ( $\leq 1$  year of age) acute lymphoblastic leukemia (ALL) and 35-50% of all infant acute myeloid leukemia (AML) cases.<sup>41</sup> As a result of *MLL* rearrangements, MLL fusion proteins (MLL-FPs) have been identified containing the MLL N-terminus fused with a C-terminus encoded by at least 84 different translocation partner genes.<sup>42</sup> Dimerization of MLL N-terminal exons resulting from in-frame partial tandem duplications of 5' *MLL* regions (*MLL*-PTD) have also been identified in AML patients comprising 4% of the *MLL*-r leukemia.<sup>41,42</sup>

*MLL* chromosomal translocations with *AF4* (*AFF1*), *AF9* (*MLLT3*), *ENL* (*MLLT1*), *AF10* (*MLLT10*), *ELL*, and *AF6* (*MLLT4*) partner genes are found in approximately 85% of *MLL*-r leukemia,<sup>43</sup> where all but *AF6* encode for nuclear proteins interacting in an elongation-assisting protein (EAP) complex,<sup>44</sup> also known as super-elongation complex or AF4 and ENL family protein complex.<sup>45,46</sup> The EAP complex is believed to participate in both physiologic and oncogenic expression of *MLL* target genes. *MLL* fusions with EAP components constitutively recruit the EAP complex to RNA pol II-poised *MLL* target oncogenes and lineage-associated genes, causing their sustained expression and the resulting transformation of hematopoietic progenitors.<sup>44</sup> Furthermore, conditional expression of *MLL* fusions with EAP components confirmed the association of *MLL*-FPs to telomeric chromatin.<sup>31</sup>

Despite the demonstrated association of *MLL* proteins with telomeres, the effect of *MLL* rearrangements on telomere transcription in human acute myeloid and lymphoblastic leukemia has not yet been evaluated. To evaluate this effect, we aimed to quantify the UUAGGG repeat-containing RNA levels in *MLL*-r and non-*MLL*-r leukemia cell lines with respect to their lineage, telomere length, and ploidy as a method for measuring differences in TERRA levels.

## Results

### Telomeric chromatin binding of MLL proteins and telomerase activity in *MLL*-rearranged acute lymphoblastic leukemia.

Our chromatin immunoprecipitation (ChIP) analysis revealed for the first time an association of MLL proteins with telomeric and centromeric chromatin in human diploid fibroblasts, telomerase- and ALT-dependent immortalized human epithelial cells, and *MLL*-r and non-*MLL*-r leukemia.<sup>31</sup> MLL proteins revealed an association with telomeric and centromeric chromatin of *MLL*-r pre-B-ALL (ALL-PO and RS4;11) and non-*MLL*-r pre-B-ALL (697 and Nalm-6), T-ALL (Jurkat), and AML (U-937) cell lines (**Table 1** and **Figure 1A**). Like endogenous MLL proteins, ectopic MLL-AF4 and MLL-AF9 fusion proteins have also shown an association with telomeric chromatin through their MLL N-terminus (MLL3AT and MLLΔT) when conditionally expressed in non-*MLL*-r U-937 myeloid leukemia stable transfectants (**Figure 1B**). As with the U-937 AML (**Figure 1C**), the telomeric-repeat amplification protocol (TRAP) detected telomerase activity in ALL-PO and RS4;11 cell lines as a telomere maintenance mechanism associated with *MLL*-r ALL.

### Increased levels of UUAGGG repeat-containing RNA in *MLL*-r ALL

To analyze the effect of *MLL* rearrangements expression on telomere transcription, we quantified the levels of UUAGGG repeat-containing RNA in a panel of *MLL*-r and non-*MLL*-r myeloid and lymphoblastic leukemia cell lines (**Table 1**) by slot-blot analysis with a 5'-



(CCCTAA)<sub>4</sub>-3' probe, which gives an unbiased quantification of the UUAGGG repeats content in a cell (**Figure 2A**). For each cell line, UUAGGG repeats signal from different blots were normalized to the corresponding 28S rRNA oligonucleotide-specific signal as an estimate of UUAGGG repeats content per transcriptome (UUAGGG/28S), averaged and expressed relative to the transcriptome-normalized UUAGGG repeats mean level in non-*MLL*-r leukemia cell lines. We used a two-tailed t-test and two-way analysis of variance (ANOVA) to assess the effects of *MLL* rearrangements expression and cell lineage on the transcription of TERRA (**Figure 2B**).

Overall, we did not find significant variation in UUAGGG/28S levels between *MLL*-r and non-*MLL*-r leukemia ( $P=0.164$ ) or between myeloid (light columns) and lymphoid (dark columns) cell lineage ( $P=0.082$ ). However, Fisher's least significant difference (Fisher's LSD) analysis showed significant differences in UUAGGG/28S levels between *MLL*-r and non-*MLL*-r ALL ( $P<0.05$ ) and between *MLL*-r ALL and *MLL*-r AML ( $P<0.02$ ), with 2.3- to 2.6-fold higher levels of UUAGGG repeat-containing RNA per transcriptome found in *MLL*-r ALL respectively (**Figure 2B**). We found no significant difference in UUAGGG/28S levels between *MLL*-r and non-*MLL*-r myeloid leukemia ( $P=0.814$ ) or between non-*MLL*-r myeloid and lymphoid cell lineage ( $P=0.944$ ).

### ***MLL* rearrangements do not affect telomere length in leukemia**

Levels of UUAGGG repeat-containing RNA per cell, both total and chromatin-bound, have been directly correlated with telomere length and telomeric CCCTAA template repeats content.<sup>23,25,28</sup> To determine whether a telomere length effect may account for differences in

UUAGGG repeats content per transcriptome (UUAGGG/28S) seen between *MLL*-r and non-*MLL*-r ALL or between *MLL*-r ALL and *MLL*-r AML, we assessed the mean telomere length (MTL) of each cell line by *HinfI/RsaI* terminal restriction fragment (TRF) analysis (**Figure 3A**). Two-way ANOVA analysis indicated no significant difference in MTL between *MLL*-r and non-*MLL*-r leukemia ( $P=0.157$ ), regardless of cell lineage (myeloid,  $P=0.197$ ; lymphoid,  $P=0.470$ ) (**Figure 3B**). This excludes *MLL* rearrangements as a significant cause of variation in telomere length and therefore in telomeric CCCTAA template repeats content in both myeloid and lymphoid leukemia. However, U-937, REH, and Karpas-45 cell lines showed an MTL greater than 10kb, well above the panel's average of 6.2kb. This may result in a marked telomere length effect on TERRA levels in U-937, REH, and Karpas-45 when compared to leukemia cell lines with lower MTL.

### **Increased levels of UUAGGG repeat-containing RNA in *MLL*-r ALL correlate with telomere length and reflect increased levels of TERRA**

We then evaluated whether a correlation exists between transcriptome normalized UUAGGG repeats content (UUAGGG/28S) and MTL in each leukemia lineage and *MLL* genotype analyzed (**Figure 4A**). Linear correlation analysis revealed a significant positive correlation between UUAGGG/28S levels and MTL in *MLL*-r leukemia ( $R=0.82$ ;  $P<0.002$ ), which includes a strong positive correlation identified in *MLL*-r ALL ( $R=0.92$ ;  $P<0.03$ ) (**Figure 4B**). We also found a moderate positive correlation between UUAGGG/28S levels and MTL in both non-*MLL*-r ( $R=0.43$ ;  $P=0.39$ ) and *MLL*-r ( $R=0.44$ ;  $P=0.38$ ) myeloid leukemia as well as in all lymphoid

leukemia cell lines analyzed ( $R=0.46$ ;  $P=0.18$ ) although the Pearson's correlation coefficient was not statistically significant in any of these correlation analyses (**Figure 4B**).

With the level of UUAGGG repeats-containing RNA per cell correlated with the length of telomeric DNA template,<sup>23,25,28</sup> an estimate of transcriptome-normalized TERRA levels (TERRA/28S) can be calculated by expressing the UUAGGG repeats content per transcriptome relative to MTL. When the UUAGGG/28S level of each cell line was divided by the corresponding MTL [(UUAGGG/28S)/MTL], we found TERRA/28S levels 1.8-fold higher in *MLL*-r than in non-*MLL*-r leukemia ( $P<0.01$ ) but not significantly different between lymphoid and myeloid leukemia ( $P=0.098$ ). *MLL*-r ALL showed TERRA/28S levels 2.8-fold higher than in non-*MLL*-r ALL ( $P<0.001$ ) and 1.9-fold higher than in *MLL*-r AML ( $P<0.005$ ) (**Figure 4C**). Among the *MLL*-r ALL cell lines analyzed, Karpas-45 retained high levels of TERRA despite a greater than average MTL and marked telomere length effect. We did not find a significant difference in TERRA/28S levels in *MLL*-r compared to non-*MLL*-r myeloid leukemia ( $P=0.678$ ) or between non-*MLL*-r myeloid and lymphoid cell lineage ( $P=0.512$ ) (**Figure 4C**). Overall, increased levels of UUAGGG repeat-containing RNA in *MLL*-r ALL positively correlate with MTL and reflect increased levels of TERRA.

### **Increased levels of TERRA in *MLL*-r ALL are independent of ploidy**

At present, no data is available on potential changes in TERRA levels related to ploidy, hereafter referred to as TERRA dosage response. For instance, the effects of whole-genome duplication, also known as tetraploidy, on TERRA levels per cell (TERRA/cell) can range from

dosage compensation, with no change in TERRA levels relative to diploid cells; to 1:1 dosage effect, with a doubling of TERRA transcripts per doubling of telomeres; or intermediate responses (**Figure 5A**).<sup>15</sup> In tetraploid cells with dosage compensation of rRNA, which accounts for approximately 80% of the overall transcriptome size, TERRA/cell directly correlate with TERRA levels per transcriptome (TERRA/28S). TERRA levels per telomere (TERRA/telomere), as a measure of TERRA dosage response, can be inferred from TERRA/28S levels when divided by ploidy [(TERRA/28S)/ploidy]. On the other hand, assuming a 1:1 rRNA dosage effect, TERRA/telomere directly correlates with TERRA/28S levels (**Figure 5A**).

Of all the leukemia cell lines analyzed, thirteen out of twenty-three carry a hypo-, hyper-, or near diploid karyotype, thus minimizing a TERRA dosage response. The remaining cell lines, three non-*MLL*-r myeloid leukemia carry hypo- to hyper-triploid karyotype while four *MLL*-r AML, two non-*MLL*-r ALL, and one *MLL*-r ALL present hypo- to near tetraploid karyotype, all with TERRA dosage response from changes in total telomere number (**Table 1** and **Figure 5B**).

Assuming rRNA dosage compensation in all polyploid cells, TERRA/telomere can be inferred from transcriptome-normalized TERRA levels when divided by ploidy [(UUAGGG/28S/MTL)/ploidy] (**Figure 5C**). The analysis confirmed significantly higher TERRA/telomere in *MLL*-r ALL than non-*MLL*-r ALL (3.2-fold;  $P < 0.0001$ ) or *MLL*-r AML (2.3-fold;  $P < 0.0005$ ), thus excluding TERRA dosage response as a significant effect on TERRA levels increase in *MLL*-r ALL. With a 1:1 rRNA dosage effect, TERRA/telomere instead correlates with TERRA/28S levels in **Figure 4C**. Overall, increased levels of TERRA in *MLL*-r

ALL are independent of ploidy, an underestimated source of potential variation in total levels of  
TERRA in a cell.

## Discussion

The chromatin modifier and transcriptional regulator MLL associates with telomeres and regulates TERRA transcription.<sup>31</sup> Our ChIP analysis has revealed an association of MLL proteins with telomeric chromatin in both non-*MLL*-r and *MLL*-r leukemia, with ectopically expressed MLL-AF4, MLL-AF9, and MLL<sup>N</sup> deletion mutants displaying binding of MLL-FPs to telomeres through their MLL N-terminus, in support of potential deregulated telomere transcription in *MLL*-r leukemia.

Here, we report significantly higher levels of TERRA in *MLL*-r than non-*MLL*-r leukemia, an *MLL* rearrangement-dependent effect that associates with lymphoid lineage. Increased levels of TERRA in *MLL*-r ALL are independent of telomere length and ploidy, which can affect respectively telomeric CCCTAA template repeats content and number of subtelomeric TERRA transcription start sites and telomeres to which TERRA binds. Comparison of four near diploid *MLL*-r pre-B-ALL and one hypotetraploid *MLL*-r T-ALL versus four near diploid non-*MLL*-r pre-B-ALL and one hypotetraploid Burkitt lymphoma accounts for the most significant difference between TERRA levels. Telomerase activity detected in ALL-PO and RS4;11 cell lines together with the lack of exceedingly long and heterogeneous ALT telomeres in all five *MLL*-r ALL support high levels of TERRA in the presence of telomerase-dependent telomere elongation. Furthermore, increased levels of TERRA in *MLL*-r ALL contrast with the reduction in TERRA levels found during the progression of telomerase-positive squamous cell, hepatocellular and endometrial carcinoma, or astrocytoma,<sup>47-50</sup> suggesting a supportive role for high TERRA levels in this leukemia subtype.

MLL expression, as well as TERRA transcription, are regulated during the cell cycle, with MLL peaking at G1/S-phase transition and both MLL and TERRA levels decreasing in the S-phase of DNA replication.<sup>51,52</sup> In late-S to G2/M-phase progression, when TERRA reaches the lowest levels, MLL increases again in the G2-phase reaching a second peak at G2/M-phase transition. MLL remains associated with chromosomes throughout the M-phase, during which it functions as a mitotic bookmark to facilitate post-mitotic transcriptional reactivation of target genes, and then decrease in the early G1-phase.<sup>33,53</sup> Interestingly, the highest levels of TERRA have been observed in the early G1-phase,<sup>52</sup> as expected from MLL target genes bookmarked for rapid transcriptional reactivation following mitotic exit. In *MLL-r* ALL, the MLL-FP levels remain constant throughout the cell cycle due to their impaired interaction with Skp2 and Cdc20, two specialized E3 ligases responsible for the cell cycle-regulated degradation of MLL by the ubiquitin/proteasome system.<sup>51</sup> A refractory MLL-FP degradation in *MLL-r* ALL may therefore lead to sustained telomere transcription and analysis of synchronized *MLL-r* ALL cells will be required to confirm elevated levels of TERRA throughout the cell cycle.

Thus, as with *ATRX* mutation in ALT cancer cells and *DNMT3B* mutation in ICF syndrome type I fibroblasts, *MLL* rearrangements in *MLL-r* ALL would also appear to prevent a negative feedback regulation of TERRA. The analysis of subtelomeric DNA methylation and telomeric H3K4 and H3K27 methylation density will be necessary to confirm an MLL-FP sustained transcriptional activity that contrasts the PRC2 silencing and heterochromatin formation activities at telomeres.<sup>54</sup> Furthermore, the association of WDR5, RbBP5, LEDGF, and menin to telomeres, as revealed by several quantitative mass spectrometry analyses of TERRA

interactome,<sup>11,39,40</sup> as well as the association of MLL to telomeric chromatin in both telomerase- and ALT-dependent cells,<sup>31</sup> suggest a deeper analysis of the role of the KMT2 complex in the regulation of telomere transcription into TERRA.

It is known that TERRA and telomere transcription do not affect telomerase-dependent telomere elongation in human cancer cells.<sup>3</sup> ATRX depletion in telomerase-positive HeLa cells has shown sustained transcription of TERRA during late-S to G2/M-phase progression without causing telomerase inactivation or affecting telomere length.<sup>19</sup> Similarly, sustained transcription of TERRA in *MLL*-r ALL occurs in the presence of telomerase activity without affecting telomere length. On the other hand, ectopic expression of telomerase contrasts with the telomeric instability caused by R-loop accelerated telomere shortening in ICF syndrome type I fibroblasts with high levels of TERRA.<sup>30,55</sup> The same occurs during ICF syndrome type I fibroblast reprogramming where the abnormal telomere phenotype is overridden and senescence suppressed by telomerase-dependent telomere elongation, despite persistent subtelomeric DNA hypomethylation and high levels of TERRA. Therefore, in the presence of telomerase activity, the loss of negative feedback regulation of TERRA does not alter telomere stability, which is instead preserved from the instability caused by R-loop-accelerated telomere shortening.

Importantly, sustained transcription of TERRA in *MLL*-r ALL does not appear to adversely affect genome stability, as indicated by lower rates of somatic alterations including copy number abnormalities such as deletions and amplifications, single-nucleotide mutations, or structural variations found in pediatric *MLL*-r ALL versus non-*MLL*-r ALL or other pediatric and adult cancers.<sup>56–58</sup> Recent studies on telomerase-positive cancer cells reveal a primary *cis* function of



TERRA in facilitating the completion of telomeric DNA replication and, consequently, in maintaining telomere and genome stability.<sup>59</sup> Besides a *cis*-protective function at telomeres, TERRA also appears to bind to extratelomeric chromatin in mouse embryonic stem cells where it exerts *trans*-regulatory activities at nearby genes.<sup>14</sup> In conclusion, sustained transcription of TERRA may provide a yet-to-be-identified telomeric and/or extratelomeric advantage to *MLL-r* ALL as part of a lymphoid transcriptional reprogramming associated with *MLL* rearrangements.

## Materials and Methods

**Cell cultures** Except for ALL-PO,<sup>60</sup> all cell lines were obtained from the American Type Culture Collection (ATCC) and the German Collection of Microorganisms and Cell Cultures (DSMZ) public repository. K-562, Nalm-1, 697, and MV4;11 cell lines were grown in IMDM medium supplemented with 10% FCS. MV4;11 cells were cultured in the presence of GM-CSF. All the other cell lines were cultured in RPMI 1640 medium supplemented with 10 to 20% FCS (RPMI-F).

**ChIP analysis** Telomeric ChIP was carried out as previously described.<sup>31</sup> Each sample consisted of  $1 \times 10^6$  cells. Chromatin was immunoprecipitated using rabbit polyclonal antibodies (pAbs) anti-MLL N terminus (M382 and M612) and corresponding preimmune sera (P), and anti-TRF2 (FC08) and corresponding preimmune sera (P2) described previously.<sup>31</sup> The resulting DNA was analyzed by slot-blot hybridization using a <sup>32</sup>P-end-labeled oligonucleotide 5'-(TTAGGG)<sub>4</sub>-3' complementary to the telomeric repeats (*tel*). The filter was then stripped and hybridized with <sup>32</sup>P-labeled p82H DNA, a human  $\alpha$ -satellite sequence specific for the centromere of every human chromosome (*cen*),<sup>31</sup> or with a mix of <sup>32</sup>P-end-labeled oligonucleotides specific for H1, H2A, H2B, and H3 histone genes (*his*). Autoradiographic signals were quantified by densitometry analysis using the ImageJ software from the National Institutes of Health.

**RNA slot-blot analysis** Total RNA preparations were cleaned with TURBO DNA-free™ (Invitrogen), quantified, and then loaded at 2, 1, 0.5, and 0.25  $\mu$ g per slot on GeneScreen Plus

filter (PerkinElmer) and UV cross-linked. The filters were hybridized overnight with a <sup>32</sup>P-end-labeled 5'-(CCCTAA)<sub>4</sub>-3' oligonucleotide complementary to TERRA's UUAGGG repeats, then stripped and hybridized with a <sup>32</sup>P-end-labeled 5'-GGGAACGTGAGCTGGGTTTAGACC-3' oligonucleotide specific to 28S rDNA as a transcriptome loading control. Autoradiography signals were quantified by densitometry analysis using ImageJ software from the National Institute of Health and each UUAGGG repeats signal was normalized to the corresponding 28S rDNA signal (UUAGGG/28S) as a measurement of absolute UUAGGG repeats per transcriptome in each cell line. For each cell line, UUAGGG/28S from different blots were then averaged and expressed relative to the mean UUAGGG/28S found in non-*MLL*-r leukemia.

**Terminal restriction fragment (TRF) analysis** *RNase*-treated genomic DNA was digested with 25U each of *HinfI* and *RsaI* restriction enzymes. The fragmented DNA was quantified and fractionated in 0.7% agarose gel for 700-1000 V·h. The gels were denatured/neutralized, and the DNA was transferred onto Hybond N-plus filters (Fisher Scientific). The filters were UV cross-linked and hybridized overnight with a <sup>32</sup>P-end-labeled 5'-(TTAGGG)<sub>4</sub>-3' oligonucleotide.

Autoradiography signals were quantified by densitometry analysis and the mean telomere length, variance, and mode were calculated using Telometric software.<sup>61</sup>

**Telomeric-repeat amplification protocol (TRAP)** Detection of telomerase activity in cell extracts was done by the PCR-based TRAP assay using the <sup>32</sup>P end-labeled TS forward and the CX reverse primers previously described.<sup>62</sup> Telomerase extracts were allowed to extend an excess of the TS primer (0.1 μg) for 15 min at 22°C in 50 μL of 1X buffer B (20 mM Tris-Cl, pH

8.3; 1.5 mM MgCl<sub>2</sub>; 63 mM KCl; 0.005% Tween 20; 1 mM EGTA; 0.1 mg/ml BSA) containing Taq DNA polymerase. After the telomerase extension reaction, telomerase activity was inactivated at 65°C for 3 min and 0.1 µg of CX oligonucleotide was added to the reaction. PCR was performed for 27 cycles as previously indicated.<sup>62</sup> Products were resolved in 15% polyacrylamide gels for 1800 Vh and the gels were fixed and exposed to autoradiography. HeLa cell extracts, no added extract, and RNase A treatment of extracts were used as controls.

## Acknowledgments

The authors would like to thank the University of Michigan for start-up grant support, Jay L. Hess, Vincenzo Pirrotta, and Dessislava Dimova for lab support and reagents. We are in debt to James Connelly, Joel Bronstein, and Dan Sanders for collecting and maintaining cell lines and technical support. We do thank Giovanni Giudici for karyotyping analysis of the ALL-PO cell line.

**Author contributions:** CC designed the study; JC, AS, and CC performed the research, analyzed, and interpreted the data for the work; CC wrote the manuscript.

**Keywords:** TERRA, telomere, transcription, MLL, acute lymphoblastic leukemia.

**Abbreviations:** TERRA, long noncoding telomeric repeat-containing RNA; MLL, mixed-lineage leukemia; non-*MLL*-r, non-*MLL*-rearranged gene; *MLL*-r, *MLL*-rearranged gene; AML, acute myeloid leukemia; ALL, acute lymphoblastic leukemia; pre-B ALL, B-cell precursor ALL.

# References

1. Azzalin CM, Reichenbach P, Khoriauli L, Giulotto E, Lingner J. Telomeric repeat containing RNA and RNA surveillance factors at mammalian chromosome ends. *Science* 2007;318(5851):798–801.
2. Schoeftner S, Blasco MA. Developmentally regulated transcription of mammalian telomeres by DNA-dependent RNA polymerase II. *Nat Cell Biol* 2008;10(2):228–36.
3. Farnung BO, Brun CM, Arora R, Lorenzi LE, Azzalin CM. Telomerase efficiently elongates highly transcribing telomeres in human cancer cells. *PLoS One* 2012;7(4):e35714.
4. Redon S, Zemp I, Lingner J. A three-state model for the regulation of telomerase by TERRA and hnRNPA1. *Nucleic Acids Res* 2013;41(19):9117–28.
5. Cusanelli E, Romero CAP, Chartrand P. Telomeric noncoding RNA TERRA is induced by telomere shortening to nucleate telomerase molecules at short telomeres. *Mol Cell* 2013;51(6):780–91.
6. Balk B, Maicher A, Dees M, et al. Telomeric RNA-DNA hybrids affect telomere-length dynamics and senescence. *Nat Struct Mol Biol* 2013;20(10):1199–205.
7. Yu T-Y, Kao Y, Lin J-J. Telomeric transcripts stimulate telomere recombination to suppress senescence in cells lacking telomerase. *Proc Natl Acad Sci* 2014;111(9):3377–3382.
8. Montero JJ, López de Silanes I, Graña O, Blasco MA. Telomeric RNAs are essential to maintain telomeres. *Nat Commun* 2016;712534.
9. Chu HP, Froberg JE, Kesner B, et al. PAR-TERRA directs homologous sex chromosome pairing. *Nat Struct Mol Biol* 2017;24(8):620–631.
10. de Silanes IL, Graña O, De Bonis ML, Dominguez O, Pisano DG, Blasco M a. Identification of TERRA locus unveils a telomere protection role through association to nearly all chromosomes. *Nat Commun* 2014;54723.
11. Viceconte N, Lorient A, Lona Abreu P, et al. PAR-TERRA is the main contributor to telomeric repeat-containing RNA transcripts in normal and cancer mouse cells. *RNA* 2021;27(1):106–121.
12. Nergadze SG, Farnung BO, Wischnewski H, et al. CpG-island promoters drive transcription of human telomeres. *RNA* 2009;15(12):2186–94.
13. Feretzaki M, Nunes PR, Lingner J. Expression and differential regulation of human TERRA at several chromosome ends. *RNA* 2019;25(11):1470–1480.
14. Chu H-P, Cifuentes-Rojas C, Kesner B, et al. TERRA RNA Antagonizes ATRX and Protects Telomeres. *Cell* 2017;170(1):86-101.e16.
15. Coate JE, Doyle JJ. Variation in transcriptome size: are we getting the message? *Chromosoma* 2015;124(1):27–43.
16. Schoenfelder KP, Fox DT. The expanding implications of polyploidy. *J Cell Biol* 2015;209(4):485–491.
17. de Silanes IL, D’Alcontres MS, Blasco MA. TERRA transcripts are bound by a complex array of RNA-binding proteins. *Nat Commun* 2010;1(1):33.
18. Flynn RL, Centore RC, O’Sullivan RJ, et al. TERRA and hnRNPA1 orchestrate an RPA-to-POT1 switch on telomeric single-stranded DNA. *Nature* 2011;471(7339):532–6.
19. Flynn RL, Cox KE, Jeitany M, et al. Alternative lengthening of telomeres renders cancer cells hypersensitive to ATR inhibitors. *Science* 2015;347(6219):273–7.

20. Yamada T, Yoshimura H, Shimada R, et al. Spatiotemporal analysis with a genetically encoded fluorescent RNA probe reveals TERRA function around telomeres. *Sci Rep* 2016;6(1):38910.
21. Arora R, Lee Y, Wischniewski H, Brun CM, Schwarz T, Azzalin CM. RNaseH1 regulates TERRA-telomeric DNA hybrids and telomere maintenance in ALT tumour cells. *Nat Commun* 2014;5(1):5220.
22. Deng Z, Norseen J, Wiedmer A, Riethman H, Lieberman PM. TERRA RNA binding to TRF2 facilitates heterochromatin formation and ORC recruitment at telomeres. *Mol Cell* 2009;35(4):403–13.
23. Arnoult N, Van Beneden A, Decottignies A. Telomere length regulates TERRA levels through increased trimethylation of telomeric H3K9 and HP1 $\alpha$ . *Nat Struct Mol Biol* 2012;19(9):948–56.
24. Montero JJ, López-Silanes I, Megías D, Fraga M, Castells-García Á, Blasco MA. TERRA recruitment of polycomb to telomeres is essential for histone trimethylation marks at telomeric heterochromatin. *Nat Commun* 2018;9(1):1548.
25. Ng LJ, Cropley JE, Pickett H a, Reddel RR, Suter CM. Telomerase activity is associated with an increase in DNA methylation at the proximal subtelomere and a reduction in telomeric transcription. *Nucleic Acids Res* 2009;37(4):1152–9.
26. Episkopou H, Draskovic I, Van Beneden A, et al. Alternative Lengthening of Telomeres is characterized by reduced compaction of telomeric chromatin. *Nucleic Acids Res* 2014;42(7):4391–4405.
27. Voon HPJ, Collas P, Wong LH. Compromised Telomeric Heterochromatin Promotes ALternative Lengthening of Telomeres. *Trends in Cancer* 2016;2(3):114–116.
28. Yehezkel S, Segev Y, Viegas-Péquignot E, Skorecki K, Selig S. Hypomethylation of subtelomeric regions in ICF syndrome is associated with abnormally short telomeres and enhanced transcription from telomeric regions. *Hum Mol Genet* 2008;17(18):2776–89.
29. Deng Z, Campbell AE, Lieberman PM. TERRA, CpG methylation and telomere heterochromatin: lessons from ICF syndrome cells. *Cell Cycle* 2010;9(1):69–74.
30. Sagie S, Toubiana S, Hartono SR, et al. Telomeres in ICF syndrome cells are vulnerable to DNA damage due to elevated DNA:RNA hybrids. *Nat Commun* 2017;8:14015.
31. Caslini C, Connelly J a, Serna A, Broccoli D, Hess JL. MLL associates with telomeres and regulates telomeric repeat-containing RNA transcription. *Mol Cell Biol* 2009;29(16):4519–26.
32. Caslini C. Transcriptional regulation of telomeric non-coding RNA: Implications on telomere biology, replicative senescence and cancer. *RNA Biol* 2010;7(1):18–22.
33. Caslini C, Alarcón As, Hess J, Tanaka R, Murti K, Biondi A. The amino terminus targets the mixed lineage leukemia (MLL) protein to the nucleolus, nuclear matrix and mitotic chromosomal scaffolds. *Leukemia* 2000;14(11):1898–1908.
34. Rao RC, Dou Y. Hijacked in cancer: the KMT2 (MLL) family of methyltransferases. *Nat Rev Cancer* 2015;15(6):334–46.
35. Guenther MG, Jenner RG, Chevalier B, et al. Global and Hox-specific roles for the MLL1 methyltransferase. *Proc Natl Acad Sci U S A* 2005;102(24):8603–8.
36. Caslini C, Yang Z, El-Osta M, Milne TA, Slany RK, Hess JL. Interaction of MLL Amino Terminal Sequences with Menin Is Required for Transformation. *Cancer Res* 2007;67(15):7275–7283.
37. Yokoyama A, Cleary ML. Menin Critically Links MLL Proteins with LEDGF on Cancer-

- Associated Target Genes. *Cancer Cell* 2008;14(1):36–46.
38. Tutton S, Azzam GA, Stong N, et al. Subtelomeric p53 binding prevents accumulation of DNA damage at human telomeres. *EMBO J* 2016;35(2):193–207.
39. Scheibe M, Arnoult N, Kappei D, et al. Quantitative interaction screen of telomeric repeat-containing RNA reveals novel TERRA regulators. *Genome Res* 2013;23(12):2149–57.
40. Fujita T, Asano Y, Ohtsuka J, et al. Identification of telomere-associated molecules by engineered DNA-binding molecule-mediated chromatin immunoprecipitation (enChIP). *Sci Rep* 2013;33171.
41. Muntean AG, Hess JL. The pathogenesis of mixed-lineage leukemia. *Annu Rev Pathol* 2012;7283–301.
42. Meyer C, Burmeister T, Gröger D, et al. The MLL recombinome of acute leukemias in 2017. *Leukemia* 2018;32(2):273–284.
43. Slany RK. The molecular biology of mixed lineage leukemia. *Haematologica* 2009;94(7):984–93.
44. Monroe SC, Jo SY, Sanders DS, et al. MLL-AF9 and MLL-ENL alter the dynamic association of transcriptional regulators with genes critical for leukemia. *Exp Hematol* 2011;39(1):77–86.e1–5.
45. Lin C, Smith ER, Takahashi H, et al. AFF4, a component of the ELL/P-TEFb elongation complex and a shared subunit of MLL chimeras, can link transcription elongation to leukemia. *Mol Cell* 2010;37(3):429–37.
46. Yokoyama A, Lin M, Naresh A, Kitabayashi I, Cleary ML. A higher-order complex containing AF4 and ENL family proteins with P-TEFb facilitates oncogenic and physiologic MLL-dependent transcription. *Cancer Cell* 2010;17(2):198–212.
47. Sampl S, Pramhas S, Stern C, Preusser M, Marosi C, Holzmann K. Expression of Telomeres in Astrocytoma WHO Grade 2 to 4: TERRA Level Correlates with Telomere Length, Telomerase Activity, and Advanced Clinical Grade. *Transl Oncol* 2012;5(1):56–IN4.
48. Vitelli V, Falvo P, G. Nergadze S, et al. Telomeric Repeat-Containing RNAs (TERRA) Decrease in Squamous Cell Carcinoma of the Head and Neck Is Associated with Worsened Clinical Outcome. *Int J Mol Sci* 2018;19(1):274.
49. Cao H, Zhai Y, Ji X, et al. Noncoding telomeric repeat-containing RNA inhibits the progression of hepatocellular carcinoma by regulating telomerase-mediated telomere length. *Cancer Sci* 2020;111(8):2789–2802.
50. Adishesh M, Alnafakh R, Baird DM, et al. Human Endometrial Carcinogenesis Is Associated with Significant Reduction in Long Non-Coding RNA, TERRA. *Int J Mol Sci* 2020;21(22):8686.
51. Liu H, Cheng EHY, Hsieh JJD. Bimodal degradation of MLL by SCFSkp2 and APCCdc20 assures cell cycle execution: a critical regulatory circuit lost in leukemogenic MLL fusions. *Genes Dev* 2007;21(19):2385–98.
52. Porro A, Feuerhahn S, Reichenbach P, Lingner J. Molecular dissection of telomeric repeat-containing RNA biogenesis unveils the presence of distinct and multiple regulatory pathways. *Mol Cell Biol* 2010;30(20):4808–17.
53. Blobel GA, Kadauke S, Wang E, et al. A Reconfigured Pattern of MLL Occupancy within Mitotic Chromatin Promotes Rapid Transcriptional Reactivation Following Mitotic Exit. *Mol Cell* 2009;36(6):970–983.



54. Schwartz YB, Pirrotta V. Polycomb silencing mechanisms and the management of genomic programmes. *Nat Rev Genet* 2007;8(1):9–22.
55. Yehezkel S, Shaked R, Sagie S, et al. Characterization and rescue of telomeric abnormalities in ICF syndrome type I fibroblasts. *Front Oncol* 2013;3(35):1–21.
56. Mullighan CG, Goorha S, Radtke I, et al. Genome-wide analysis of genetic alterations in acute lymphoblastic leukaemia. *Nature* 2007;446(7137):758–64.
57. Bardini M, Spinelli R, Bungaro S, et al. DNA copy-number abnormalities do not occur in infant ALL with t(4;11)/MLL-AF4. *Leukemia* 2010;24(1):169–176.
58. Andersson AK, Ma J, Wang J, et al. The landscape of somatic mutations in infant MLL-rearranged acute lymphoblastic leukemias. *Nat Genet* 2015;47(4):330–7.
59. Beishline K, Vladimirova O, Tutton S, Wang Z, Deng Z, Lieberman PM. CTCF driven TERRA transcription facilitates completion of telomere DNA replication. *Nat Commun* 2017;8(1):2114.
60. Gobbi A, Di Berardino C, Scanziani E, et al. A human acute lymphoblastic leukemia line with the T(4;11) translocation as a model of minimal residual disease in SCID mice. *Leuk Res* 1997;21(11–12):1107–1114.
61. Grant JD, Broccoli D, Muquit M, Manion FJ, Tisdall J, Ochs MF. Telometric: a tool providing simplified, reproducible measurements of telomeric DNA from constant field agarose gels. *Biotechniques* 2001;31(6):1314–6, 1318.
62. Broccoli D, Youngtt JW, De Lange T. Telomerase activity in normal and malignant hematopoietic cells. *Cell Biol* 1995;92(September):9082–9086.
63. Drexler HG, Quentmeier H, MacLeod RAF. Malignant hematopoietic cell lines: In vitro models for the study of MLL gene alterations. *Leukemia*.

## Figure Legends

### Figure 1. Telomeric chromatin binding of MLL proteins and telomerase activity in

**MLL-r ALL (A)** Representative ChIP analysis of *MLL*-r pre-B-ALL (ALL-PO and RS4;11) and non-*MLL*-r pre-B-ALL (Nalm-6 and 697), T-ALL (Jurkat), and AML (U-937) cell lines. Chromatin was immunoprecipitated using pAbs against MLL<sup>N</sup> and TRF2 proteins, blotted and hybridized sequentially with <sup>32</sup>P-end-labeled oligonucleotides specific for telomeric DNA repeats (*tel*), human  $\alpha$ -satellite centromeric DNA (*cen*), and histones coding sequences (*his*). The input signal consists of 2% of the amount of chromatin used with each immunoprecipitation. P and P2 are pre-bleed sera respectively of  $\alpha$ -MLL<sup>N</sup> and  $\alpha$ -TRF2 pAbs. **(B)** Empty vector-transfected (NT) U-937 cells and clones conditionally expressing FLAG-tagged MLL-AF4 and MLL-AF9 fusion proteins and N-terminal fragments retaining 410 (MLL3AT) and 1436 (MLL $\Delta$ T) amino acids of MLL<sup>N</sup> under tetracycline (*Tet*)-off conditions were grown in the presence (+) or absence (-) of 1  $\mu$ g/ml *Tet*. An equal number of cells were then analyzed by ChIP for conditionally expressed MLL protein binding to telomeric DNA repeats (*tel*) using  $\alpha$ -FLAG pAbs. We quantified MLL protein signals by ImageJ densitometry analysis, normalized each (-) *Tet* signal towards the corresponding (+) *Tet* signal (dark columns) and expressed relative to the NT signal (light column). **(C)** Telomere repeats amplification protocol (TRAP) analysis of non-*MLL*-r U-937, and *MLL*-r ALL-PO and RS4;11 cell lines. All three cell lines revealed telomerase activity for telomere length maintenance. HeLa cell extract and treatment with RNase were used as control.

### Figure 2. Increased levels of UUAGGG repeat-containing RNA in *MLL*-r ALL

(A) Representative TERRA slot-blot analysis of total RNA extracted from leukemia cell lines.

*DNase*-treated total RNA was loaded at 2.0, 1.0, 0.5, and 0.25 µg per slot on filter and UV cross-linked. Filters were sequentially hybridized with <sup>32</sup>P-end-labeled oligonucleotides specific for TERRA [5'-(CCCTAA)<sub>4</sub>-3'] and 28S rRNA (5'-GGGAACGTGAGCTGGGTTTAGACC-3') as a transcriptome loading control. We quantified autoradiography signals by ImageJ densitometry analysis. (B) Quantitation of UUAGGG repeat-containing RNA levels in myeloid (light columns) and lymphoblastic (dark columns) leukemia cell lines carrying or not *MLL* rearrangements. For each cell line, UUAGGG repeat signals from different blots were normalized to the corresponding 28S rRNA signals for equal transcriptome loading (UUAGGG/28S), averaged, and expressed relative to the mean value of UUAGGG/28S levels in non-*MLL*-r leukemia cell lines. Error bars represent the standard error of the mean (s.e.m.) between 2 to 5 separate experiments. We calculated the *P*-value through two-way ANOVA analysis.

**Figure 3. *MLL* rearrangements do not affect telomere length in leukemia (A)**

Representative TRF analysis of myeloid and lymphoblastic leukemia cell lines carrying or not *MLL* rearrangements. Filters were hybridized with <sup>32</sup>P-end-labeled 5'-(TTAGGG)<sub>4</sub>-3' oligonucleotide complementary to the telomeric leading-strand CCCTAA repeats. (B) Telomere length analysis of myeloid and lymphoblastic leukemia cell lines. The duplex-repeat signal intensity was measured by densitometry analysis and the mean telomere length (MTL) was calculated using Telometric software (see Materials and Methods). MTL value (kb) and standard deviation bars are indicated. We calculated the *P*-value by two-way ANOVA analysis.

**Figure 4. Increased levels of UUAGGG-containing RNA in *MLL-r* ALL correlate with telomere length and reflect increased levels of TERRA** (A) Linear correlation analysis between UUAGGG repeat-containing RNA level per transcriptome (UUAGGG/28S) and mean telomere length (MTL) in leukemia cell lines of myeloid and lymphoid lineage carrying (*MLL-r*) or not (non-*MLL-r*) an *MLL*-rearranged genotype. Best trendline, linear trendline equation, and squared Pearson's correlation coefficient ( $R^2$ ) are indicated. (B) Pearson's correlation coefficient (R) and relative two-tailed probability value ( $p$ ) from the linear correlation analysis. Statistically significant Pearson's correlation coefficients are indicated in bold (\*). (C) An estimate of transcriptome-normalized TERRA levels (TERRA/28S) was calculated by expressing the UUAGGG repeat-containing RNA level per transcriptome (UUAGGG/28S) relative to MTL. The TERRA/28S level [(UUAGGG/28S)/MTL] of each cell line was expressed relative to the mean TERRA/28S value in non-*MLL-r* leukemia. We performed statistical analysis by two-way ANOVA.

**Figure 5. Increased levels of TERRA in *MLL-r* ALL are independent of ploidy** (A) Potential TERRA dosage response in tetraploidy. The effects of chromosome set quadrupling (gray rods in the nucleus) on telomere transcription relative to diploid cells can go from dosage compensation, with no change in TERRA levels (gray wavy lines); to 1:1 dosage effect, with doubling of TERRA transcripts per doubling of telomeres; or intermediate responses (not illustrated). The same goes for rRNA (black wavy lines). In tetraploid cells with rRNA dosage compensation, TERRA levels per cell (TERRA/cell) correlate well with transcriptome-normalized TERRA levels (TERRA/28S) when expressed relative to diploid cells, regardless of TERRA dosage response. TERRA levels per telomere (TERRA/telomere) are inferred from

TERRA/28S when divided by ploidy. In tetraploid cells with a 1:1 rRNA dosage effect, TERRA/28S is directly correlated with TERRA/telomere. **(B)** Total number of telomeres in each analyzed myeloid (light columns) and lymphoblastic (dark columns) leukemia cell lines carrying or not *MLL* rearrangements, as obtained from the cytogenetic analysis of the German Collection of Microorganisms and Cell Cultures (DSMZ) public repository (see **Table 1**). Bars indicate the range of chromosome ends number. **(C)** TERRA/telomere levels as a measure of TERRA dosage response by polyploid cells with rRNA dosage compensation. Slot-blot UUAGGG repeat signals were measured by densitometry, normalized to the corresponding 28S rRNA signals, averaged, and then corrected for MTL (UUAGGG/28S/MTL). The obtained transcriptome-normalized TERRA levels were then divided by ploidy [(UUAGGG/28S/MTL)/ploidy] as a measure of TERRA/telomere levels and expressed relative to the average in non-*MLL*-r leukemia cell lines. We performed statistical analysis through two-way ANOVA.

**Table 1** *MLL*-rearranged and non-*MLL*-rearranged leukemia cell lines

|                                           | Cell type                             | Cell line               | Clinical data <sup>b</sup> | Cytogenetic                       | Fusion gene                                                | Karyotype                                                                       | Ploidy <sup>e</sup> |
|-------------------------------------------|---------------------------------------|-------------------------|----------------------------|-----------------------------------|------------------------------------------------------------|---------------------------------------------------------------------------------|---------------------|
| <b>non-<i>MLL</i>-rearranged leukemia</b> |                                       |                         |                            |                                   |                                                            |                                                                                 |                     |
| 1                                         | Chronic myeloid leukemia              | K-562                   | CML, 53 F, PE              | t(9;22)(q34;q11)                  | <i>BCR-ABL</i> <sup>d</sup>                                | hypotriploid - 64(61-68)<3n>                                                    | 2.8                 |
| 2                                         | Chronic myeloid leukemia              | NALM-1 <sup>a</sup>     | CML, 3 F, PB               | t(9;22)(q34;q12) <sup>c</sup>     | <i>BCR-ABL</i>                                             | hypodiploid with 5% polyploidy - 45(42-47)<2n>                                  | 2.0                 |
| 3                                         | Acute myeloid leukemia                | ME-1 <sup>a</sup>       | AML, M4eo, 40 M, PB        | inv(16)(p13;q22)                  | <i>CBFβ-MYH11</i> <sup>d</sup>                             | near diploid - 47<2n>                                                           | 2.0                 |
| 4                                         | Acute myeloid leukemia                | KASUMI-1 <sup>a</sup>   | AML, M2, 7 M, PB           | t(8;21)(q22;q22) <sup>c</sup>     | <i>AML1-ETO</i> <sup>d</sup>                               | hypodiploid - 45<2n>                                                            | 2.0                 |
| 5                                         | Acute myeloid leukemia                | U-937                   | AML, M5, 37 M, PE          | t(10;11)(p13;q14)                 | <i>CALM-AF10</i>                                           | hypotriploid - 63(58-69)<3n>                                                    | 2.7                 |
| 6                                         | Acute promyelocytic leukemia          | NB-4 <sup>a</sup>       | AML, M3, 23 F, BM          | t(15;17)(q22;q11-12) <sup>c</sup> | <i>PML-RARα</i> <sup>d</sup>                               | hypertriploid with 3% polyploidy - 78(71-81)<3n>                                | 3.4                 |
| 7                                         | B cell precursor leukemia             | 697 <sup>a</sup>        | pre-B ALL, 12 M, BM        | t(1;19)(q23;p13) <sup>c</sup>     | <i>E2A-PBX</i> <sup>d</sup>                                | near diploid - 46(45-48)<2n>                                                    | 2.0                 |
| 8                                         | B cell precursor leukemia             | NALM-6 <sup>a</sup>     | pre-B ALL, 19 M, PB        | t(5;12)(q33;p13) <sup>c</sup>     | <i>TEL-PDGFRβ</i>                                          | near diploid - 46(43-47)<2n>                                                    | 2.0                 |
| 9                                         | B cell precursor leukemia             | REH <sup>a</sup>        | pre-B ALL, 15 F, PB        | t(12;21)(p13;q22) <sup>c</sup>    | <i>TEL-AML1</i> <sup>d</sup>                               | pseudodiploid - 46(44-47)<2n>                                                   | 2.0                 |
| 10                                        | B cell precursor leukemia             | HAL-01 <sup>a</sup>     | pre-B ALL, 17 F, PB        | t(17;19)(q22;p13) <sup>c</sup>    | <i>E2A-HLF</i> <sup>d</sup>                                | near diploid with 4% polyploidy; 46(43-48)<2n>                                  | 2.0                 |
| 11                                        | Burkitt lymphoma                      | RAJI <sup>a</sup>       | Burkitt Lymphoma, 12 M, LM | t(8;14)(q24;q32) <sup>c</sup>     | <i>IgH-cMYC</i>                                            | hypotetraploid with 12% polyploidy - 89(80-91)<4n>                              | 3.9                 |
| 12                                        | T cell leukemia                       | JURKAT <sup>a</sup>     | T-ALL, 14 M, PB            | add(2)(p21)del(2)(p23)x2          | —                                                          | hypotetraploid karyotype with 7.8% polyploidy - 87(78-91)<4n>                   | 3.8                 |
| <b><i>MLL</i>-rearranged leukemia</b>     |                                       |                         |                            |                                   |                                                            |                                                                                 |                     |
| 13                                        | Acute myeloid (eosinophilic) leukemia | EOL-1 <sup>a</sup>      | AML, 33 M, PB              | del(4)(q12)x2 <sup>c</sup>        | <i>FIP1L1-PDGFRα</i><br>& <i>MLL-PTD</i><br><i>MLL-PTD</i> | hyperdiploid with 7.5% polyploidy - 50(48-51)<2n><br>near tetraploid - 91<4n>   | 2.2<br>4.0          |
| 14                                        | Acute monocytic leukemia              | KOPM-88                 | AML, 11 M, PB              | <i>MLL-PTD</i>                    | <i>MLL-PTD</i>                                             | hyperdiploid - 48(46-48)<2n>                                                    | 2.1                 |
| 15                                        | Acute monocytic leukemia              | MV4;11 <sup>a</sup>     | AML, M5, 10 M, ?           | t(4;11)(q21;q23) <sup>c</sup>     | <i>MLL-AF4</i> <sup>d</sup>                                | hypotetraploid with near-diploid (8%) and polyploid (17%) sidelines - 84-90<4n> | 3.8                 |
| 16                                        | Acute monocytic leukemia              | MONO-MAC-6 <sup>a</sup> | AML, M5, 64 M, PB          | t(9;11)(p22;q23) <sup>c</sup>     | <i>MLL-AF9</i>                                             | near-tetraploid - 94(88-96)<4n>                                                 | 4.1                 |
| 17                                        | Acute monocytic leukemia              | THP-1 <sup>a</sup>      | AML, 1 M, PB               | t(9;11)(p22;q23) <sup>c</sup>     | <i>MLL-AF9</i>                                             | near tetraploid - 92(84-94)<4n>                                                 | 4.0                 |
| 18                                        | Acute myelomonocytic leukemia         | ML-2 <sup>a</sup>       | AML, M4, 26 M, PB          | t(6;11)(q27;q23) <sup>c</sup>     | <i>MLL-AF6</i> <sup>d</sup>                                | hypodiploid with 4% polyploidy - 45(42-45)<2n>                                  | 2.0                 |
| 19                                        | B cell precursor leukemia             | KOPN-8 <sup>a</sup>     | pre-B ALL, <1 F, PB        | t(11;19)(q23;p13) <sup>c</sup>    | <i>MLL-ENL</i> <sup>d</sup>                                | hyperdiploid with 20% polyploidy - 57<2n> (*)                                   | 2.5                 |
| 20                                        | B cell precursor leukemia             | ALL-PO                  | pre-B ALL, <1 F, BM        | t(4;11)(q21;q23) <sup>c</sup>     | <i>MLL-AF4</i>                                             | hyperdiploid - 47/48<2n>                                                        | 2.0                 |
| 21                                        | B cell precursor leukemia             | RS4;11                  | pre-B ALL, 32 F, BM        | t(4;11)(q21;q23) <sup>c</sup>     | <i>MLL-AF4</i> <sup>d</sup>                                | hypodiploid with 1.5% polyploidy - 45(40-46)<2n>                                | 2.0                 |
| 22                                        | B cell precursor leukemia             | SEM <sup>a</sup>        | pre-B ALL, 5 F, PB         | t(4;11)(q21;q23) <sup>c</sup>     | <i>MLL-AF4</i> <sup>d</sup>                                | hypotetraploid with 8% polyploidy - 87(84-88)<4n>                               | 3.8                 |
| 23                                        | T cell leukemia                       | KARPAS-45 <sup>a</sup>  | T-ALL, 2 M, BM             | t(X;11)(q13;q23) <sup>c</sup>     | <i>MLL-AFX1</i>                                            |                                                                                 |                     |

**Table 1** *MLL*-rearranged and non-*MLL*-rearranged leukemia cell lines <sup>a</sup> Cell lines obtained from the German Collection of Microorganisms and Cell Cultures (DSMZ) public repository (see <https://www.dsmz.de>). <sup>b</sup> Clinical data as reported at the DSMZ and in the literature: type of disease, age (years) /sex, source of material from which cell line was established. <sup>c</sup> Cytogenetic analysis at the DSMZ confirmed the chromosomal abnormality. <sup>d</sup> RT-PCR at the DSMZ showed the expression of the fusion gene. (\*) Karyotype provided by Giovanni Giudici (Centro Ricerca Tettamanti, Clinica Pediatrica Università Milano-Bicocca, Ospedale S. Gerardo, Monza, Italy). Abbreviations: ALL, acute lymphoblastic leukemia; AML, acute myeloid leukemia; APL, acute promyelocytic leukemia; CML chronic myeloid leukemia; pre-B, B-cell precursor; T-ALL, T-cell ALL; BM, bone marrow; PB, peripheral blood; PE, pleural effusion; LM, left maxilla; F, female.

female; M, male; PTD, partial tandem duplication.<sup>e</sup> Ploidy level calculated as the total number of chromosomes divided by 23.

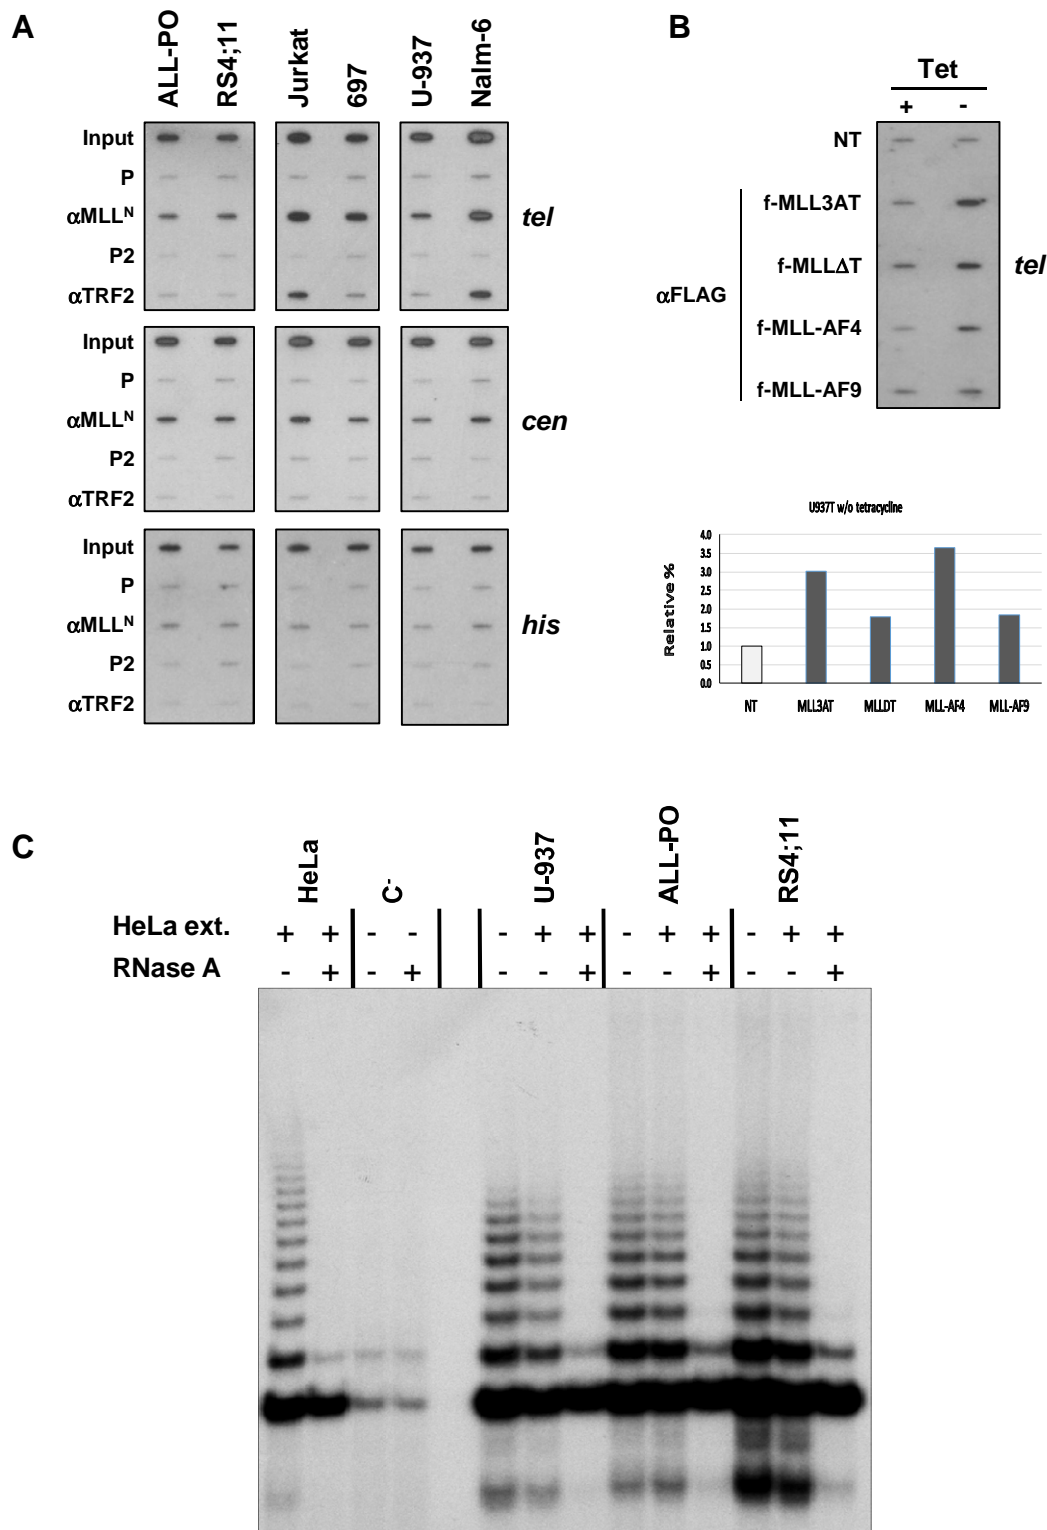

**Figure 1.** Telomeric chromatin binding of MLL proteins and telomerase activity in *MLL-r* ALL



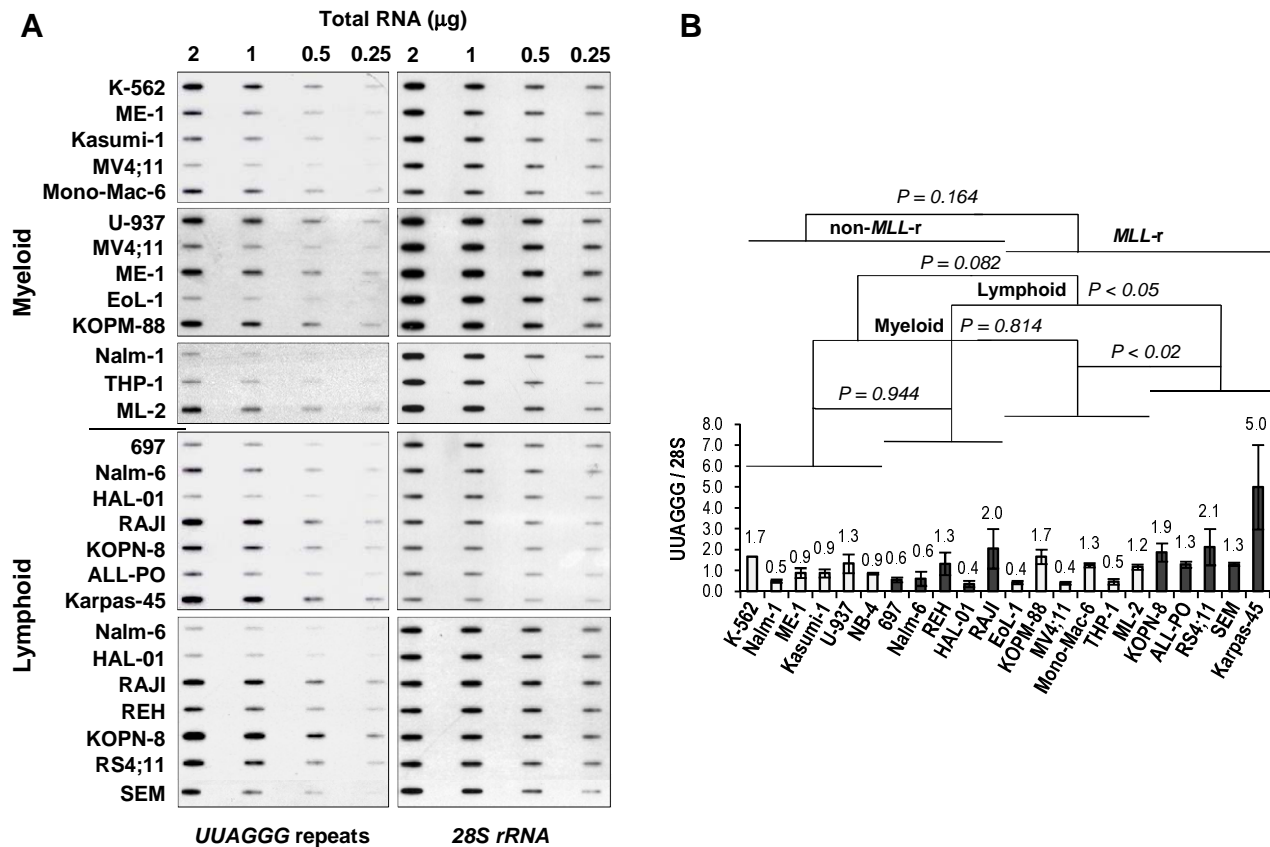

**Figure 2.** Increased levels of UUAGGG repeat-containing RNA are associated with *MLL* rearrangements in ALL

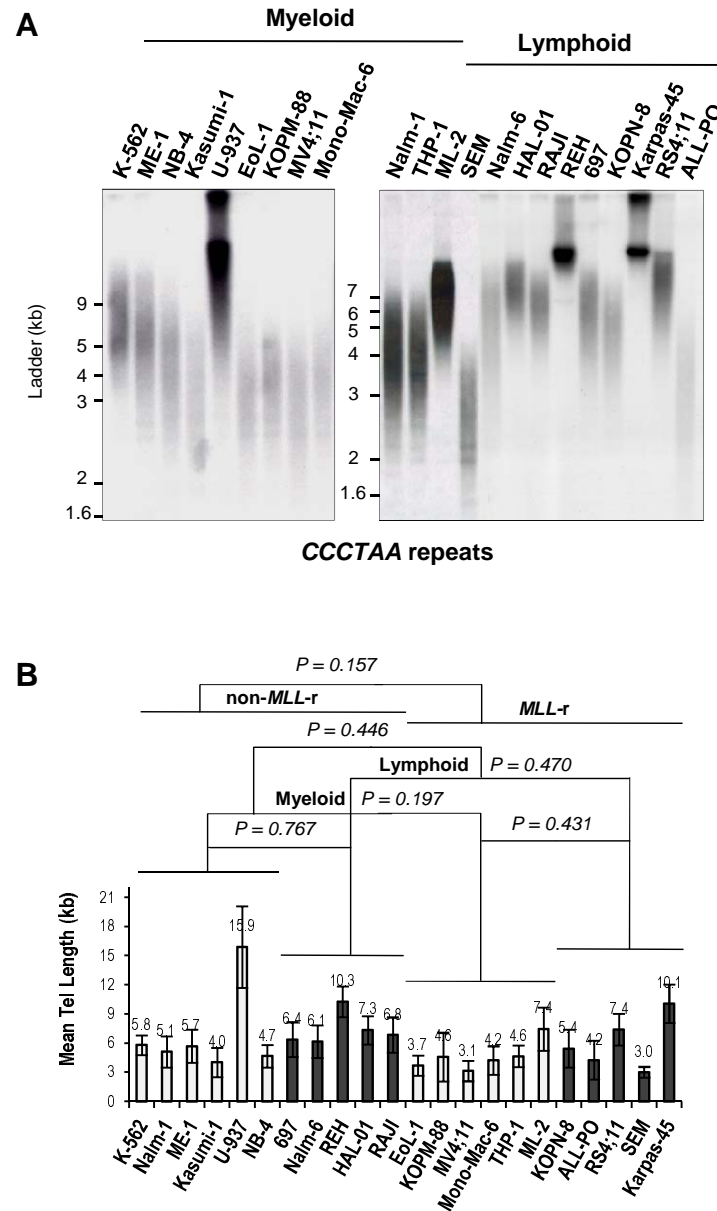

**Figure 3.** *MLL* rearrangements do not affect telomere length in leukemia

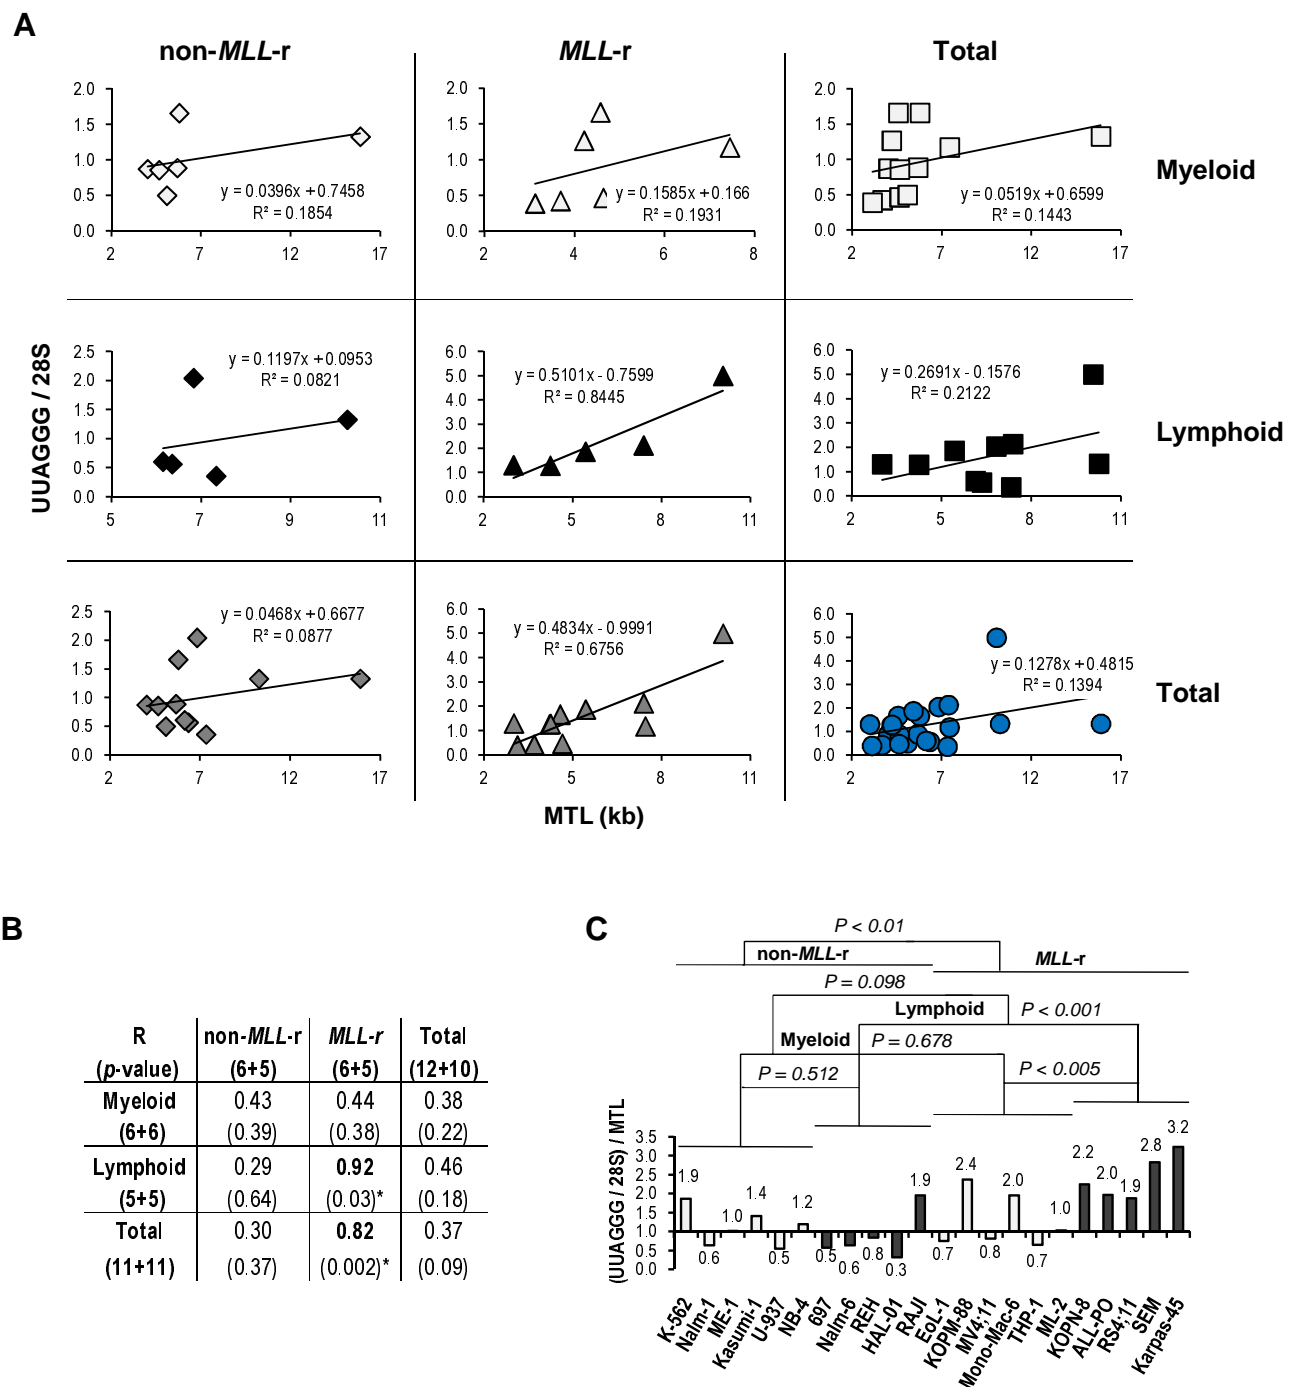

**Figure 4.** Increased levels of UUAGGG repeat-containing RNA in *MLL-r* ALL correlate with telomere length and reflect increased levels of TERRA

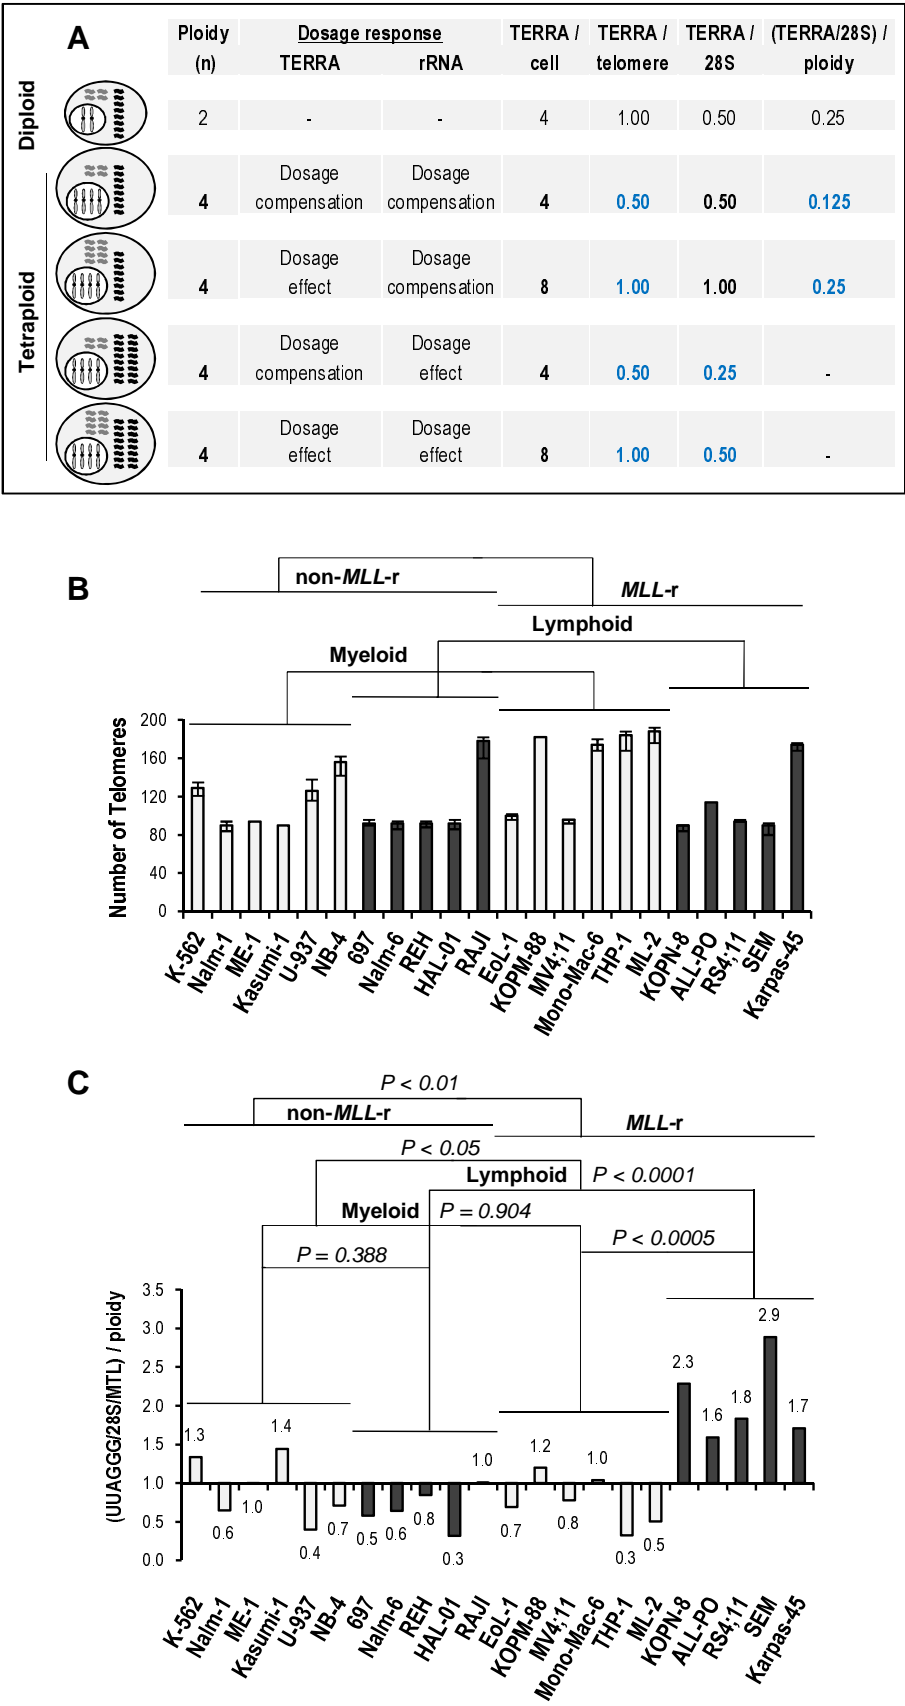

**Figure 5.** Increased levels of TERRA in *MLL-r* ALL are independent of ploidy
